# Supplementary figures and images for: Learning accurate path integration in ring attractor models of the head direction system
Source: eLife journal article supplement (doi:10.7554/elife.69841), 2022-06-20

**A**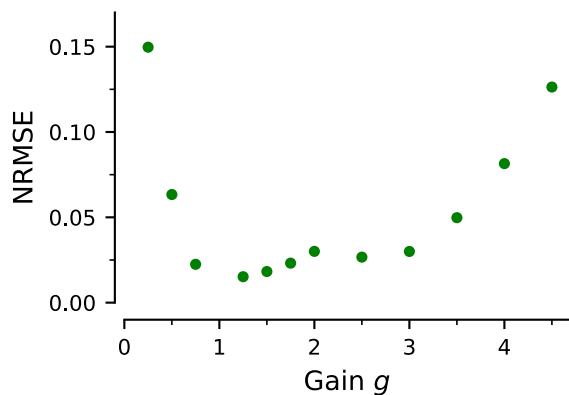**B**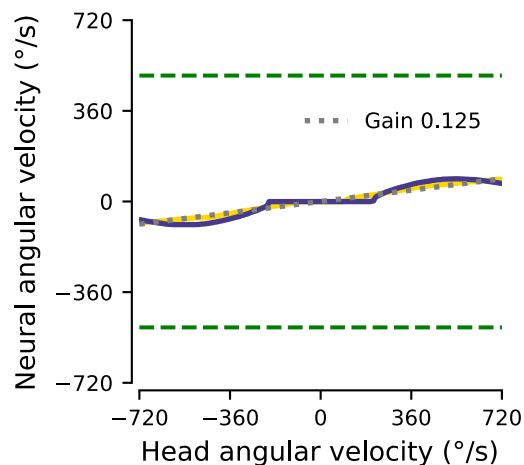**C**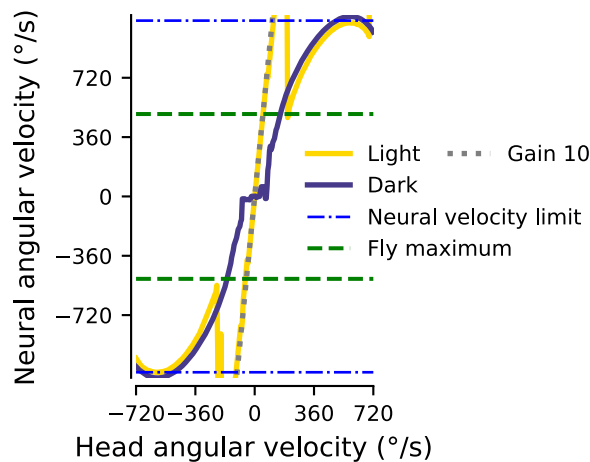**D**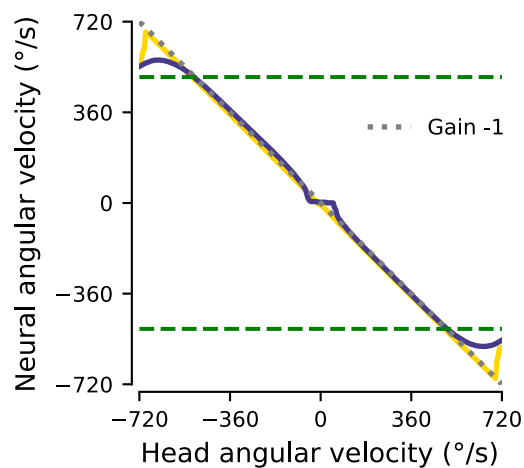**E**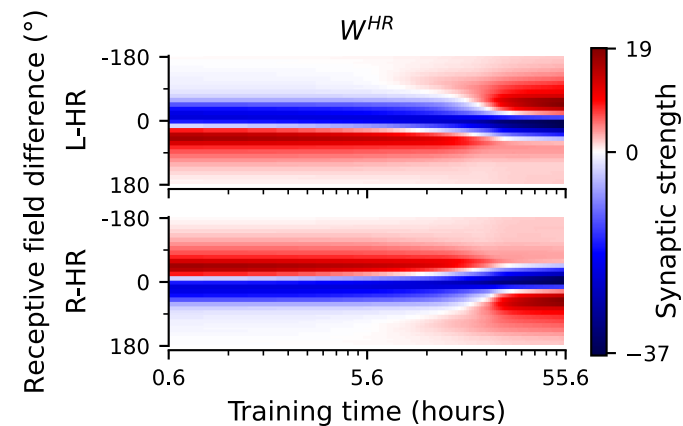**F**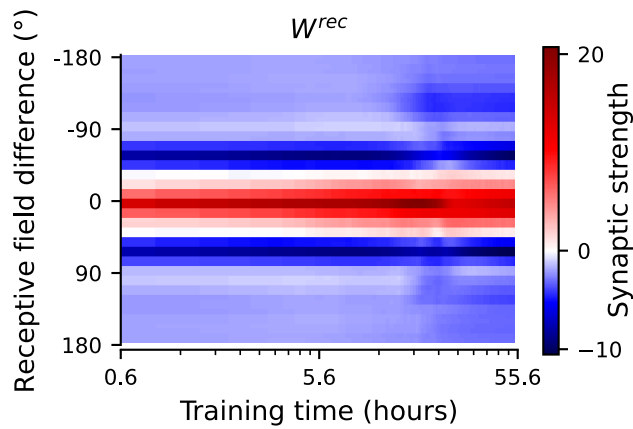

Supplement: supp [file elife-69841-supp-v1.zip]

**A**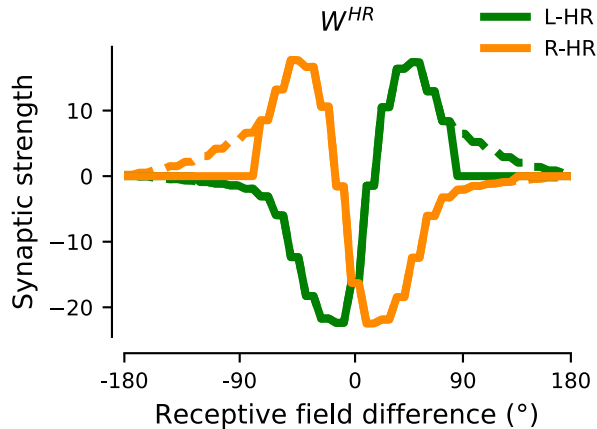**B**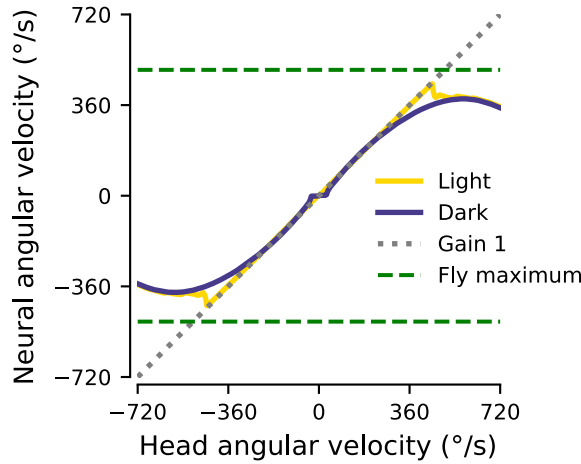

Supplement: supp [file elife-69841-supp-v1.zip]

**A**

●  $W^{HR}$  (P-EN1)    
 ●  $W^{rec}$  (P-EN2)    
 ●  $I^{vis}$  (R2)    
 ●  $I^{vis}$  (R4d)

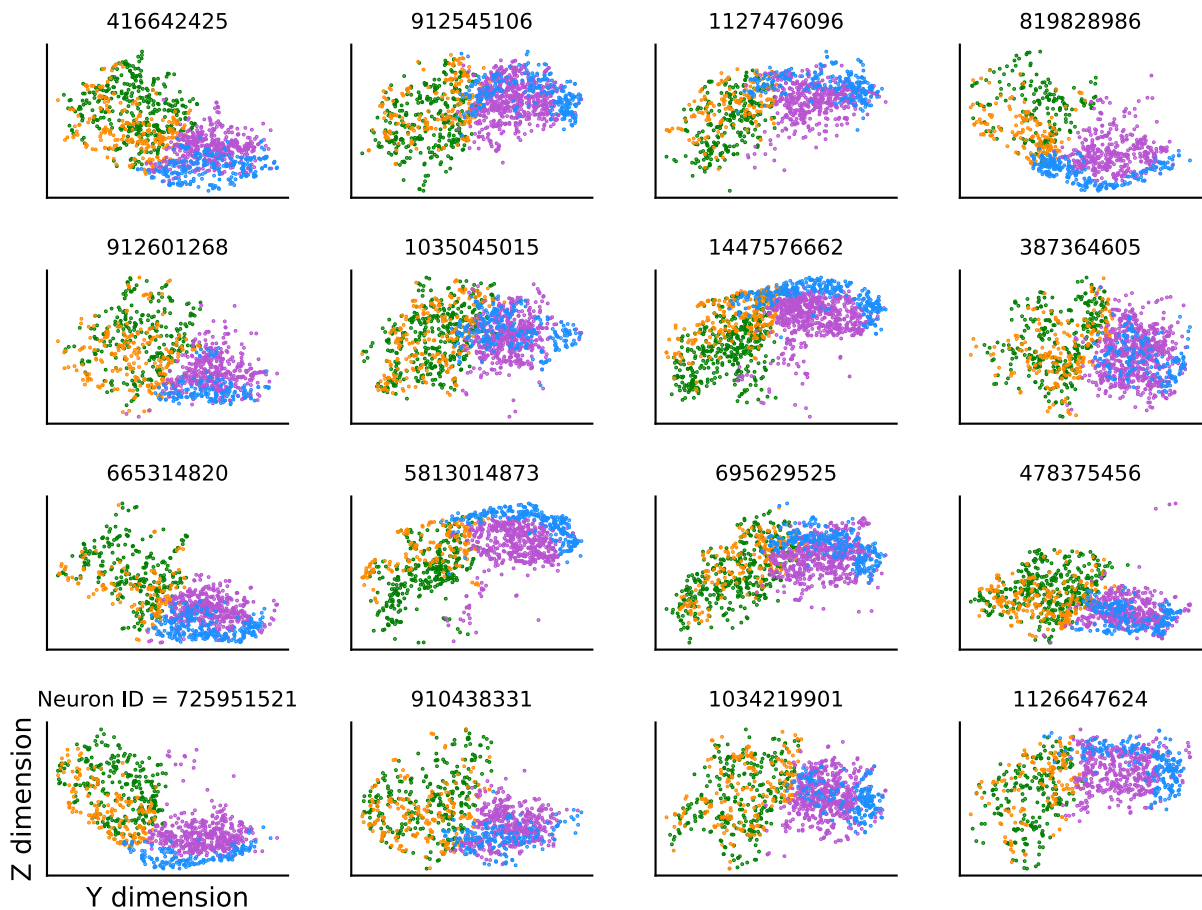**B**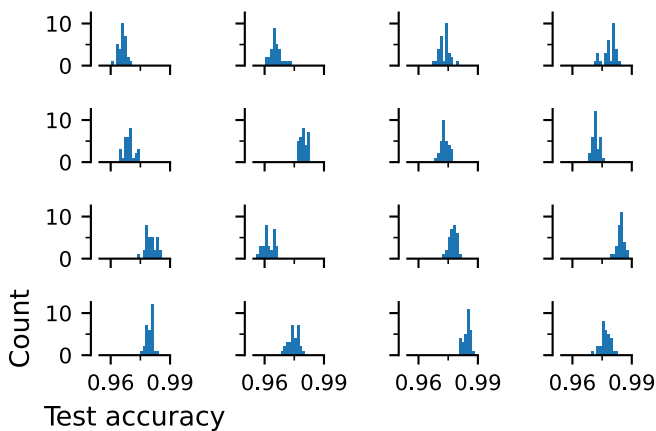

Supplement: supp [file elife-69841-supp-v1.zip]

**A**

— Light — Dark — PVA

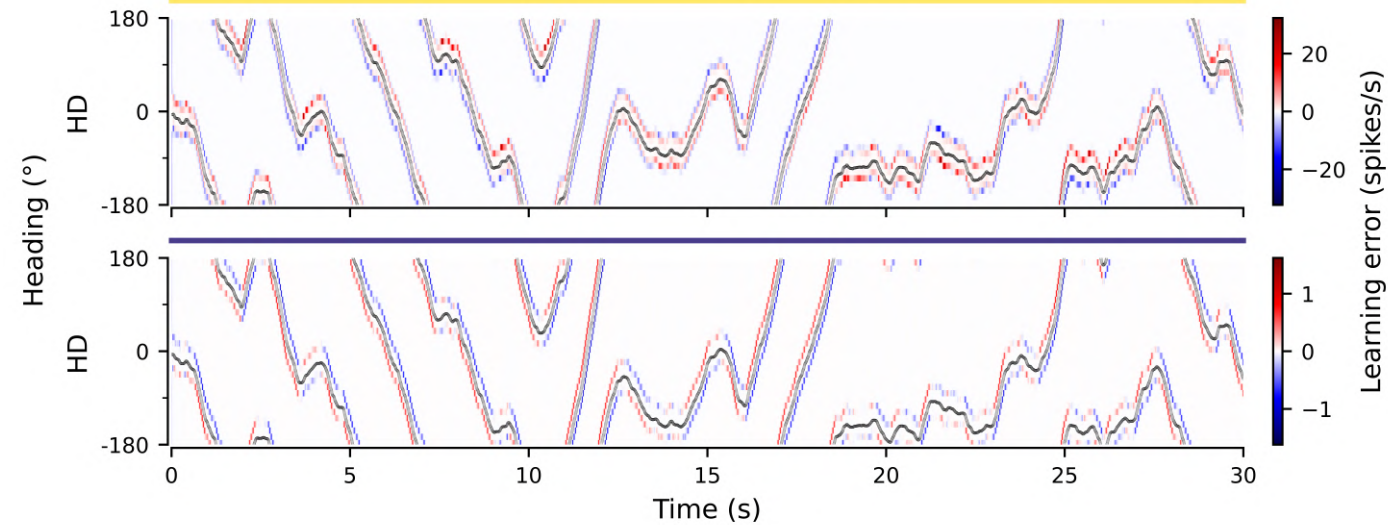**B**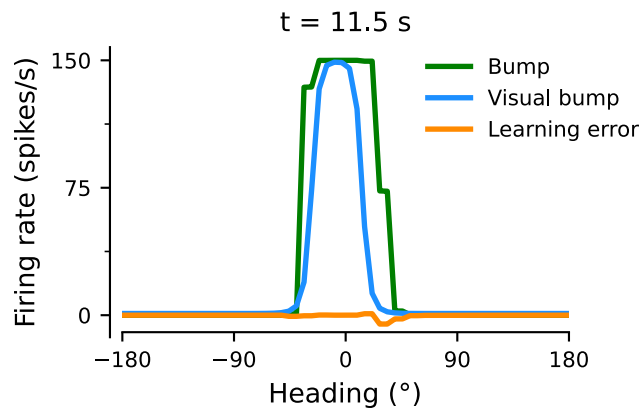**C**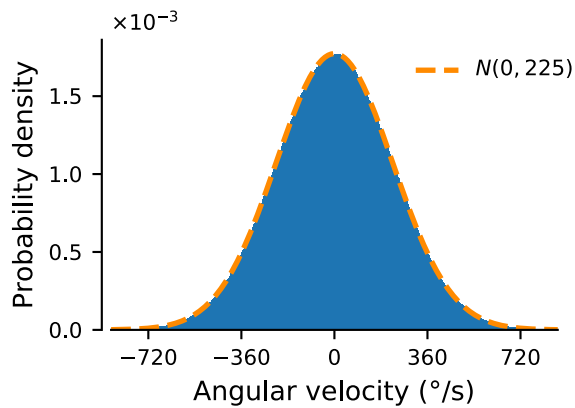

Supplement: supp [file elife-69841-supp-v1.zip]

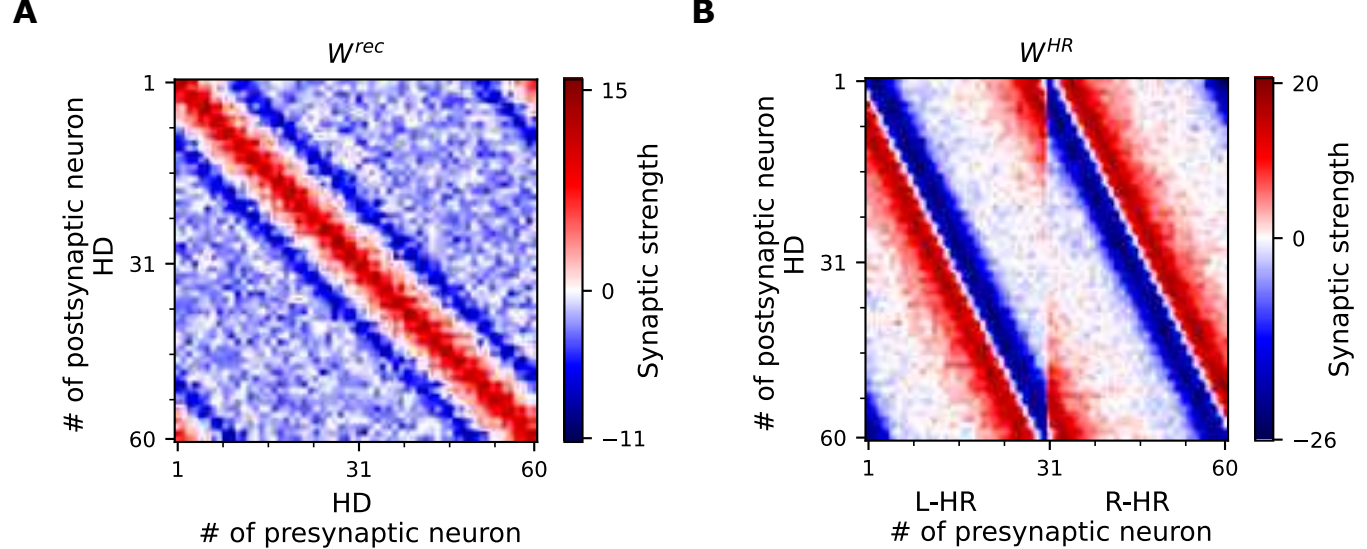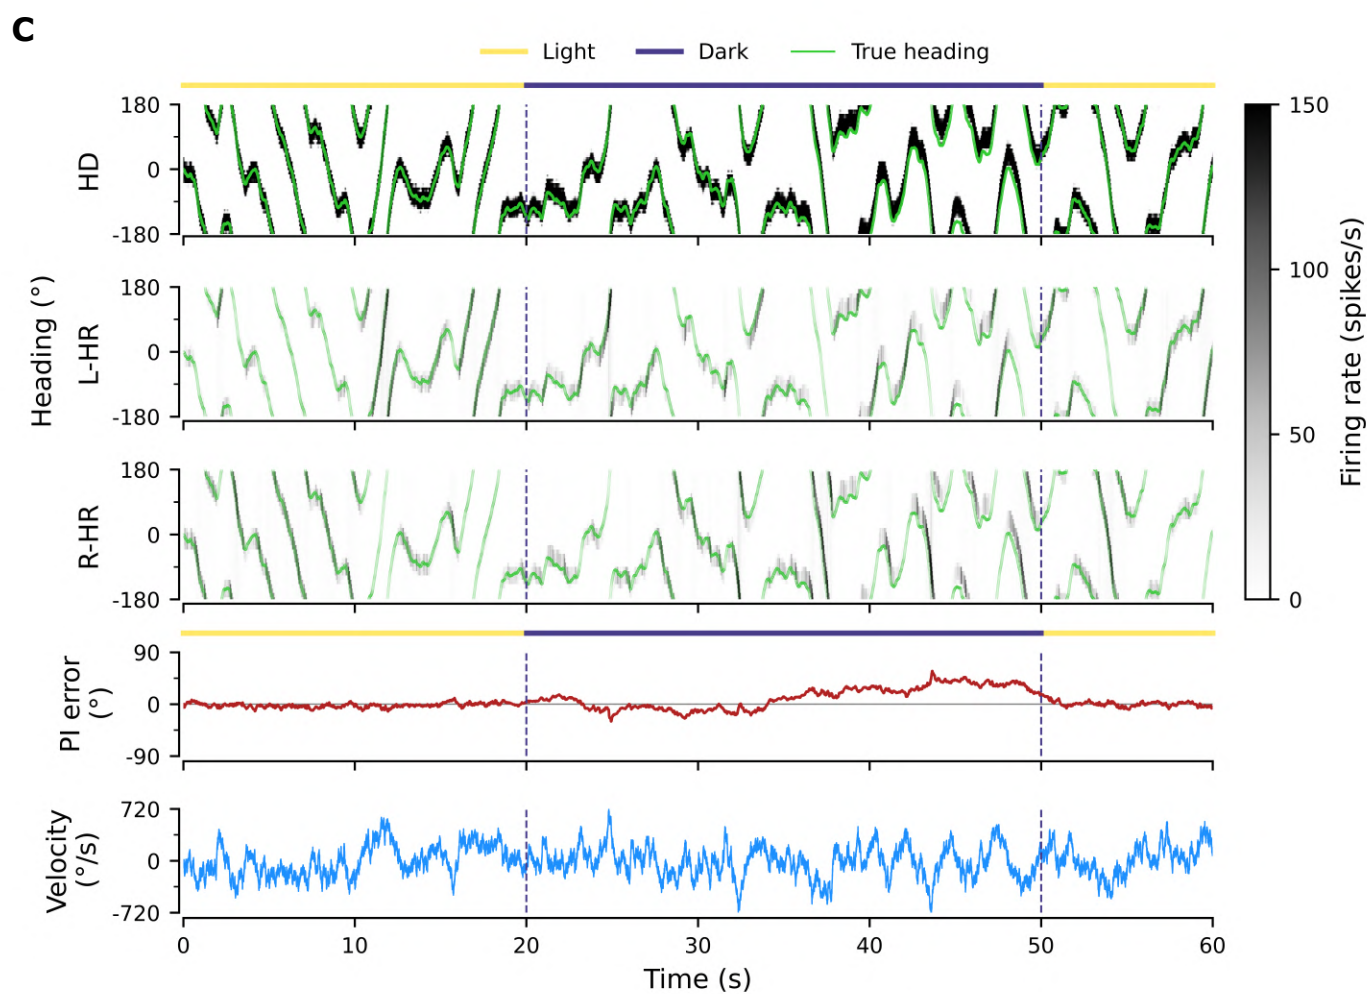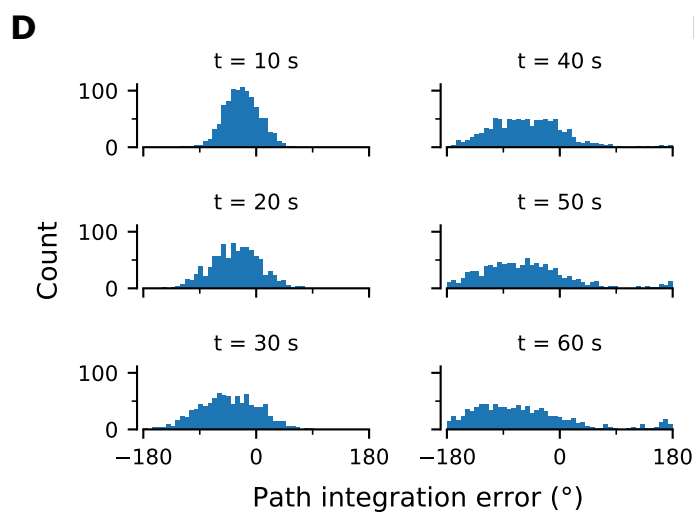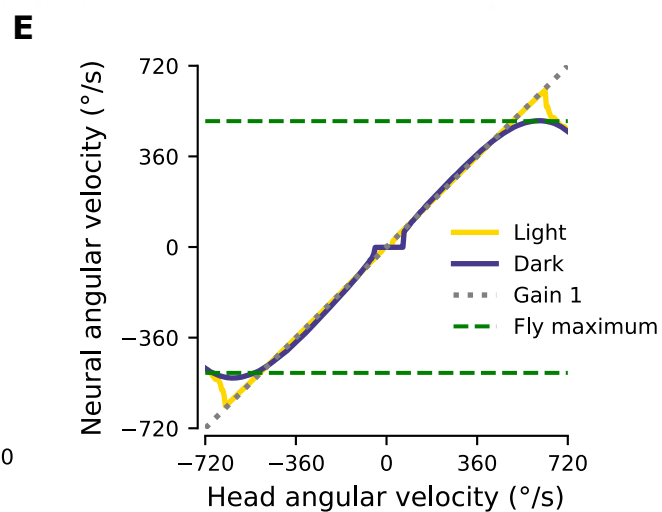

Supplement: supp [file elife-69841-supp-v1.zip]
